# Supplementary material
Source: PubMed Central journal article supplement (PMC8111562)

## Supplemental Online Content

Gaudino M, Robinson NB, Audisio K, et al. Trends and characteristics of retracted articles in the biomedical literature, 1971 to 2020. *JAMA Intern Med*. Published online May 10, 2021. doi:10.1001/jamainternmed.2021.1807

**eMethods.** Scopus search strategy

**eFigure.** Flowchart of the articles selection process

This supplemental material has been provided by the authors to give readers additional information about their work.

## **eMethods. Scopus search strategy**

On November 30, 2020, we searched the Scopus database for English articles published from 1971 to 2020 in the following subject areas: “biochemistry, genetics and molecular biology”, “dentistry”, “health professions”, “immunology and microbiology”, “medicine”, “neuroscience”, “nursing”, “pharmacology, toxicology and pharmaceuticals”, and “psychology.” We excluded abstracts, brief reports, books, book chapters, conference papers, conference reviews, editorials, erratum, letters, and notes.

**eFigure. Flowchart of the articles selection process**

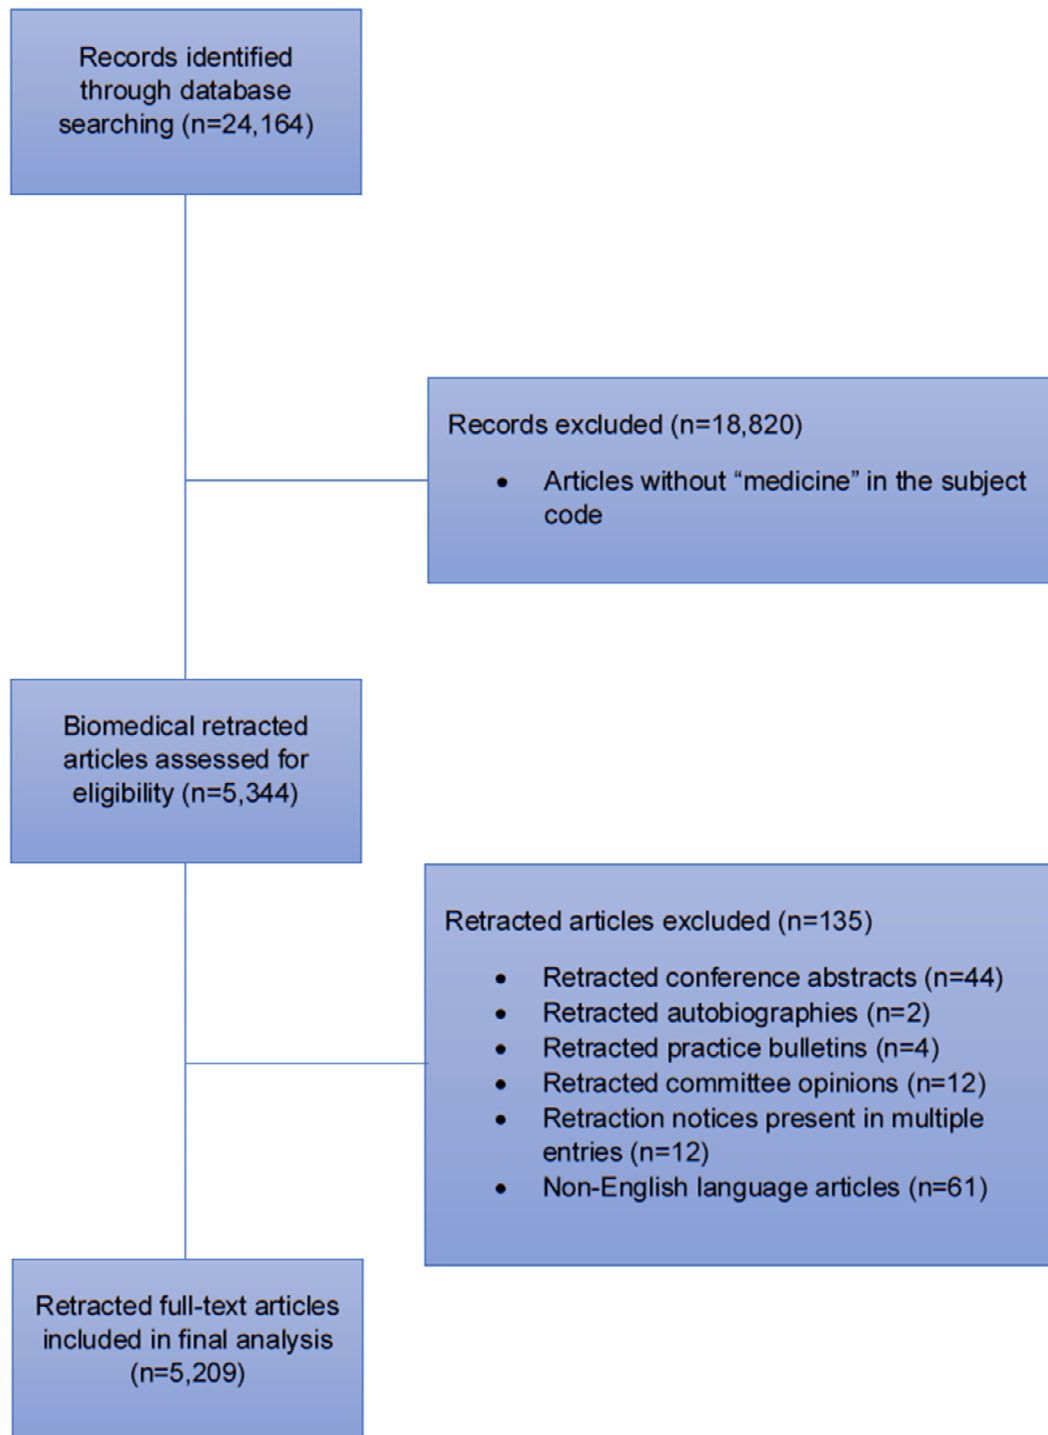

Supplement: jamainternmed-e211807-s001.pdf [file jamainternmed-e211807-s001.pdf]
